# Supplementary material for: Regulation of neural stem cell fate decisions by mitochondrial dynamics
Source: PubMed Central journal article supplement — Neural Regen Res. 2018 Sep;13(9):1548–9. doi: 10.4103/1673-5374.237115 (PMC6126118; doi:10.4103/1673-5374.237115), 2018-09
Supplement: NRR-13-1548_Suppl1.pdf [file NRR-13-1548_Suppl1.pdf]

## PEER-REVIEW REPORT 1

**Name of journal:** Neural Regeneration Research

**Manuscript NO:** NRR-D-18-00297

**Title:** Regulation of neural stem cell fate decisions by mitochondrial dynamics

**Reviewer's Name:** Saravana Kumar

**Reviewer's country:** India

**Date sent for review:** 2018-05-10

**Date reviewed:** 2018-05-22

**Review time:** 12 Days

Your peer review comments will be published as an open peer review report. Do you agree to have your name included with the published article?

yes

### COMMENTS TO AUTHORS

General comment:

MINOR CORRECTIONS:

1. some of the abbreviations that are given in brackets with capital but mentioned in small letter throughout.
2. while starting a sentence author name is mentioned and also at the end the reference is given for the same sentence. kindly modify all those sentences. give references only at the end of the sentences.
3. some of the abbreviation are not mentioned eg: FACS - fluorescence-activated cell sorting.
4. some sentences are not understandable eg: study by Jeremy Rich's group (Xie et al., 2015).
