# Supplementary material for: Regulation of neural stem cell fate decisions by mitochondrial dynamics
Source: PubMed Central journal article supplement — Neural Regen Res. 2018 Sep;13(9):1548–9. doi: 10.4103/1673-5374.237115 (PMC6126118; doi:10.4103/1673-5374.237115), 2018-09
Supplement: NRR-13-1548_Suppl2.pdf [file NRR-13-1548_Suppl2.pdf]

## PEER-REVIEW REPORT 2

**Name of journal:** Neural Regeneration Research

**Manuscript NO:** NRR-D-18-00297

**Title:** Regulation of neural stem cell fate decisions by mitochondrial dynamics

**Reviewer's Name:** L. Buzanska

**Reviewer's country:** Poland

**Date sent for review:** 2018-05-10

**Date reviewed:** 2018-05-24

**Review time:** 14 Days

Your peer review comments will be published as an open peer review report. Do you agree to have your name included with the published article?

Yes

### COMMENTS TO AUTHORS

This is an excellent and comprehensive comment on the interesting field of investigation regarding the role of mitochondrial dynamics in driving neural stem cell. The set of papers coming out from Ruth Slack laboratory, that the author refer to in this paper, gives the strong evidence and provide mechanistic data (both in vitro and in vivo), on the crucial role of mitochondrial in the neural commitment and was definitely worth to be given such focused attention. I may only suggest that recently papers appeared on the possible involvement of the mitochondrial biogenesis in the neural fate specification (Augustyniak et al. 2017 Tox in Vitro, Augustyniak et al. 2017 Biogerontology).
